# Supplementary material for: The incidence of congenital hypothyroidism (CH) in Guangxi, China and the predictors of permanent and transient CH
Source: PubMed Central journal article supplement — Endocr Connect. 2017 Oct 26;6(8):926–34. doi: 10.1530/EC-17-0289 (PMC5704446; doi:10.1530/ec-17-0289), 2017-10-26
Supplement: ec-6-926-t001.pdf [file ec-6-926-t001.pdf]

**S1 Table. Normal ranges for serum TSH and FT4 in venous sample**

| Sample time | Normal range* |              |
|-------------|---------------|--------------|
|             | TSH (mIU/l)   | FT4 (pmol/L) |
| Newborns    | 0.70-15.2     | 11.0-32.0    |
| 6d-3mth     | 0.72-10.0     | 12.0-28.3    |
| 4-12mth     | 0.73-8.35     | 11.9-25.6    |
| 1-6yr       | 0.70-5.97     | 12.3-22.8    |
| 7-11yr      | 0.60-4.84     | 12.5-21.5    |
| 12-20yr     | 0.51-4.30     | 12.6-21.0    |

\* Data obtained from Roche Diagnostics recommendations and internal database.
