# Supplementary material for: The incidence of congenital hypothyroidism (CH) in Guangxi, China and the predictors of permanent and transient CH
Source: PubMed Central journal article supplement — Endocr Connect. 2017 Oct 26;6(8):926–34. doi: 10.1530/EC-17-0289 (PMC5704446; doi:10.1530/ec-17-0289), 2017-10-26
Supplement: ec-6-926-t002.pdf [file ec-6-926-t002.pdf]

**S2 Table. Sensitivities and specificities of different predictors for the differential diagnosis between TCH and PCH, based on the results of the ROC curve analysis.**

| <b>Predictive factor</b>                  | <b>AUC</b> | <b>Optimal cutoff</b> | <b>Specificity (%)</b> | <b>Sensitivity (%)</b> |
|-------------------------------------------|------------|-----------------------|------------------------|------------------------|
| Initial L-T4 dose                         | 0.6455     | 33.5(μg/day)          | 67.65                  | 52.94                  |
| TSH level at diagnosis                    | 0.6889     | 97.1(mIU/l)           | 52.94                  | 84.56                  |
| FT4 level at diagnosis                    | 0.6690     | 4.6 (pmol/l)          | 69.85                  | 60.29                  |
| L-T4 dose duration after diagnosis (days) |            |                       |                        |                        |
| 30                                        | 0.6388     | 33(μg/day)            | 55.15                  | 64.71                  |
| 60                                        | 0.6850     | 33(μg/day)            | 72.06                  | 59.56                  |
| 90                                        | 0.7220     | 30(μg/day)            | 78.68                  | 58.09                  |
| 120                                       | 0.7277     | 30(μg/day)            | 81.62                  | 55.88                  |
| 150                                       | 0.7317     | 30(μg/day)            | 83.82                  | 52.21                  |
| 180                                       | 0.7398     | 30(μg/day)            | 83.82                  | 52.94                  |
| 210                                       | 0.7075     | 30(μg/day)            | 84.56                  | 55.15                  |
| 240                                       | 0.7672     | 30(μg/day)            | 84.56                  | 57.35                  |
| 270                                       | 0.7870     | 30(μg/day)            | 85.29                  | 58.82                  |
| 300                                       | 0.7884     | 31.25(μg/day)         | 85.29                  | 58.82                  |
| 330                                       | 0.8084     | 31.25(μg/day)         | 87.50                  | 61.03                  |
| 360                                       | 0.8152     | 31.25(μg/day)         | 87.50                  | 62.50                  |
| 720                                       | 0.8860     | 31.25(μg/day)         | 94.12                  | 67.65                  |
| 1080                                      | 0.8974     | 31.25(μg/day)         | 95.00                  | 58.62                  |
