# Supplementary material for: The incidence of congenital hypothyroidism (CH) in Guangxi, China and the predictors of permanent and transient CH
Source: PubMed Central journal article supplement — Endocr Connect. 2017 Oct 26;6(8):926–34. doi: 10.1530/EC-17-0289 (PMC5704446; doi:10.1530/ec-17-0289), 2017-10-26
Supplement: ec-6-926-t003.pdf [file ec-6-926-t003.pdf]

**S3 Table. The effectiveness evaluation of the cut-offs for differentiating PCH and TCH**

| Patient         | Gender | Age*<br>(year) | TSH*<br>(mIU/l) | FT4*<br>(pmol/l) | L-T4 dose at 90 days<br>after diagnosis (µg/day) | Clinical Phenotype by<br>thyroid function tests | Predictor result by         |                             |                                            |
|-----------------|--------|----------------|-----------------|------------------|--------------------------------------------------|-------------------------------------------------|-----------------------------|-----------------------------|--------------------------------------------|
|                 |        |                |                 |                  |                                                  |                                                 | TSH*<br>(cutoff: 97.1mIU/l) | FT4*<br>(cutoff: 4.6pmol/l) | L-T4 dose at 90 days<br>(cutoff: 30µg/day) |
| 1               | male   | NS             | >100            | 3.73             | 37.5                                             | PCH                                             | ✓                           | ✓                           | ✓                                          |
| 2               | male   | NS             | 40.64           | 8.19             | 16.7                                             | TCH                                             | ✓                           | ✓                           | ✓                                          |
| 3               | male   | NS             | >100            | 1.9              | 25                                               | TCH                                             | ×                           | ×                           | ✓                                          |
| 4               | female | NS             | >100            | 1.16             | 25                                               | TCH                                             | ×                           | ×                           | ✓                                          |
| 5               | female | NS             | >100            | 9.91             | 16.7                                             | TCH                                             | ×                           | ✓                           | ✓                                          |
| 6               | male   | NS             | >100            | 2.27             | 37.5                                             | PCH                                             | ✓                           | ✓                           | ✓                                          |
| 7               | female | NS             | 83.13           | 10.44            | 16.7                                             | TCH                                             | ✓                           | ✓                           | ✓                                          |
| 8               | female | NS             | >100            | 6.22             | 37.5                                             | PCH                                             | ✓                           | ×                           | ✓                                          |
| 9               | male   | NS             | >100            | 3.8              | 37.5                                             | PCH                                             | ✓                           | ✓                           | ✓                                          |
| 10              | female | NS             | 37.38           | 11.36            | 25                                               | TCH                                             | ✓                           | ✓                           | ✓                                          |
| 11              | female | NS             | >100            | 1.25             | 50                                               | PCH                                             | ✓                           | ✓                           | ✓                                          |
| 12              | male   | NS             | 86.4            | 9.91             | 20                                               | TCH                                             | ✓                           | ✓                           | ✓                                          |
| 13              | female | NS             | >100            | 6.11             | 37.5                                             | PCH                                             | ✓                           | ×                           | ✓                                          |
| 14              | female | NS             | >100            | 1.83             | 37.5                                             | PCH                                             | ✓                           | ✓                           | ✓                                          |
| 15              | female | NS             | >100            | 7.27             | 25                                               | TCH                                             | ×                           | ✓                           | ✓                                          |
| 16              | female | NS             | >100            | 3.78             | 20                                               | TCH                                             | ×                           | ×                           | ✓                                          |
| 17              | female | NS             | 85              | 5.8              | 10.5                                             | TCH                                             | ✓                           | ✓                           | ✓                                          |
| 18              | female | NS             | >100            | 1.87             | 16.7                                             | TCH                                             | ×                           | ×                           | ✓                                          |
| 19              | male   | NS             | 90              | 8.14             | 25                                               | TCH                                             | ✓                           | ✓                           | ✓                                          |
| 20              | male   | NS             | 50.24           | 10.33            | 25                                               | TCH                                             | ✓                           | ✓                           | ✓                                          |
| 21              | female | NS             | >100            | 2.68             | 0                                                | TCH                                             | ×                           | ×                           | ✓                                          |
| 22              | female | NS             | >100            | 2.64             | 31.23                                            | TCH                                             | ×                           | ×                           | ×                                          |
| 23              | male   | NS             | >100            | 2.83             | 37.5                                             | PCH                                             | ✓                           | ✓                           | ✓                                          |
| 24              | female | NS             | >100            | 4.54             | 25                                               | TCH                                             | ×                           | ✓                           | ✓                                          |
| 25              | female | NS             | >100            | 1.8              | 37.5                                             | PCH                                             | ✓                           | ✓                           | ✓                                          |
| 26              | female | NS             | >100            | 2.43             | 20                                               | TCH                                             | ×                           | ×                           | ✓                                          |
| 27              | female | NS             | 93.78           | 8.74             | 16.7                                             | TCH                                             | ✓                           | ✓                           | ✓                                          |
| 28              | male   | NS             | >100            | 3.87             | 37.5                                             | PCH                                             | ✓                           | ✓                           | ✓                                          |
| 29              | male   | NS             | >100            | 3.34             | 37.5                                             | TCH                                             | ×                           | ×                           | ×                                          |
| 30              | male   | NS             | >100            | 1.83             | 25                                               | TCH                                             | ×                           | ×                           | ✓                                          |
| 31              | female | NS             | 23.88           | 10.54            | 25                                               | TCH                                             | ✓                           | ✓                           | ✓                                          |
| 32              | male   | NS             | >100            | 4.7              | 16.7                                             | TCH                                             | ×                           | ✓                           | ✓                                          |
| 33              | female | NS             | >100            | 0.61             | 37.5                                             | PCH                                             | ✓                           | ✓                           | ✓                                          |
| <b>Accuracy</b> |        |                |                 |                  |                                                  |                                                 | <b>60.6%</b>                | <b>66.7%</b>                | <b>93.9%</b>                               |

\* Age, TSH, FT4 at diagnosis; NS: Newborn Screening
